# Supplementary material for: Highly efficient degradation of reactive black KN-B dye by ultraviolet light responsive ZIF-8 photocatalysts with different morphologies
Source: Royal Society of Chemistry journal article supplement (doi:10.1039/d2ra08312d), 2023-01-01
Supplement: d2ra08312d1.pdf [file d2ra08312d1.pdf]

# Supporting Information

## Highly Efficient Degradation of Reactive Black KN-B Dye by Ultraviolet Light Responsive ZIF-8 Photocatalysts with Different Morphologies

*Le Gia Trung,<sup>a,1</sup> Minh Kim Nguyen,<sup>b,1</sup> Thi Dieu Hang Nguyen,<sup>c</sup> Vy Anh Tran,<sup>d,e</sup> Jin Seog*

*Gwag,<sup>a,\*</sup> and Nguyen Tien Tran<sup>f,g,\*</sup>*

<sup>a</sup> Department of Physics, Yeungnam University, Gyeongsan, Gyeongbuk 38541, Republic of Korea.

<sup>b</sup> College of Pharmacy, Chungnam National University, Yuseong, Daejeon 34134, Republic of Korea.

<sup>c</sup> The University of Da Nang, University of Science and Technology (DUT), 54 Nguyen Luong Bang, Da Nang, 550000, Vietnam.

<sup>d</sup> Institute of Applied Technology and Sustainable Development, Nguyen Tat Thanh University, Ho Chi Minh City 700000, Vietnam.

<sup>e</sup> Faculty of Environmental and Food Engineering, Nguyen Tat Thanh University, Ho Chi Minh City 700000, Vietnam.

<sup>f</sup> Center for Advanced Chemistry, Institute of Research and Development, Duy Tan University, 03 Quang Trung, Da Nang, 550000, Vietnam.

<sup>g</sup> Faculty of Natural Sciences, Duy Tan University, 03 Quang Trung, Da Nang, 550000, Vietnam.

\* Corresponding authors:

E-mail address: [sweat3000@ynu.ac.kr](mailto:sweat3000@ynu.ac.kr), [trannguyentien@duytan.edu.vn](mailto:trannguyentien@duytan.edu.vn)

<sup>1</sup> These authors contributed equally to this work and are co-first authors.

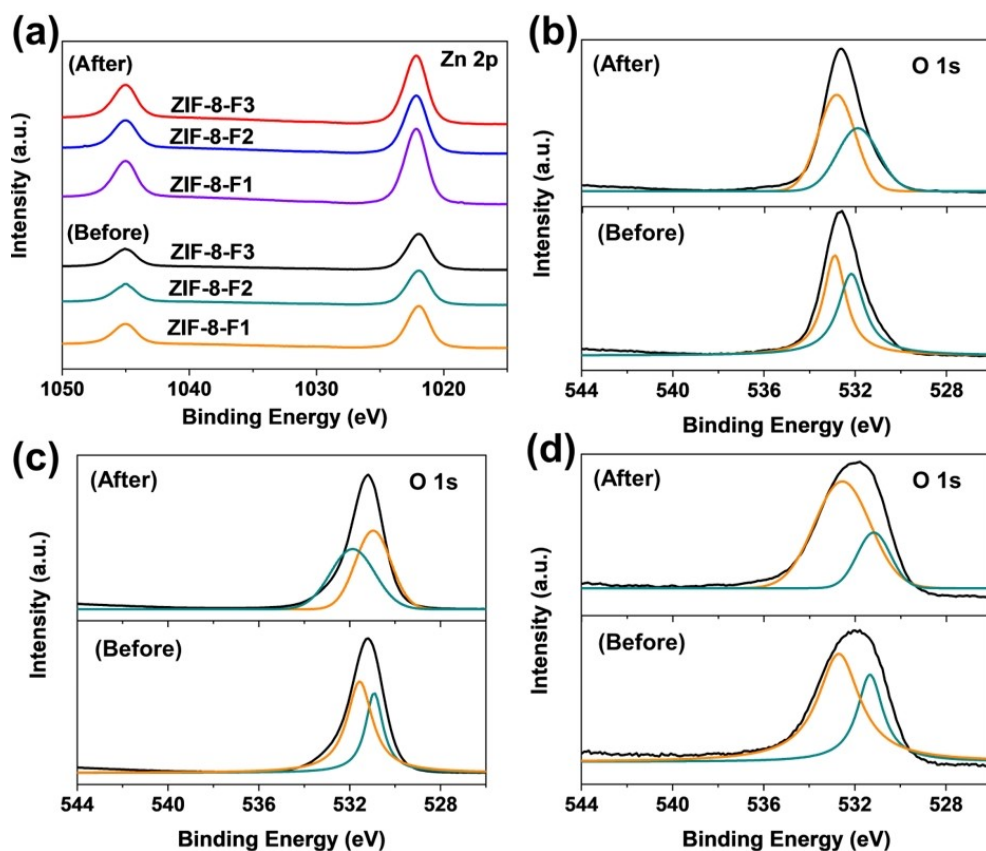

**Figure S1.** The  $Zn_{2p}$  spectra of three ZIF-8 materials (a) and  $O_{1s}$  XPS spectra of dodecahedral ZIF-8-F1 (b), pitaya-like ZIF-8-F2 (c), leaf-like ZIF-8-F3 (d) before and after three cycles of RB5 photodegradation.

The XPS spectra of three ZIF-8 materials before and after three cycles of RB5 photodegradation can be well fitted by Gaussian–Lorentz functions. The binding energies of three ZIFs for  $Zn_{2p}$  observed at approximately 1022.2 and 1045.0 eV are related to  $Zn_{2p_{3/2}}$  and  $Zn_{2p_{1/2}}$ , respectively.<sup>1</sup> After photodegrading with RB5 dye, the peaks for  $Zn_{2p}$  shifted insignificantly, implying no chemical bonding with RB5.

The  $O_{1s}$  spectra of three initial ZIF-8 samples detected at approximately 531.1 and 532.2 eV are attributed to the hydroxyl groups (OH) that interacted with unsaturated zinc and physically absorbed water molecules ( $H_2O$ ), respectively.<sup>2</sup>

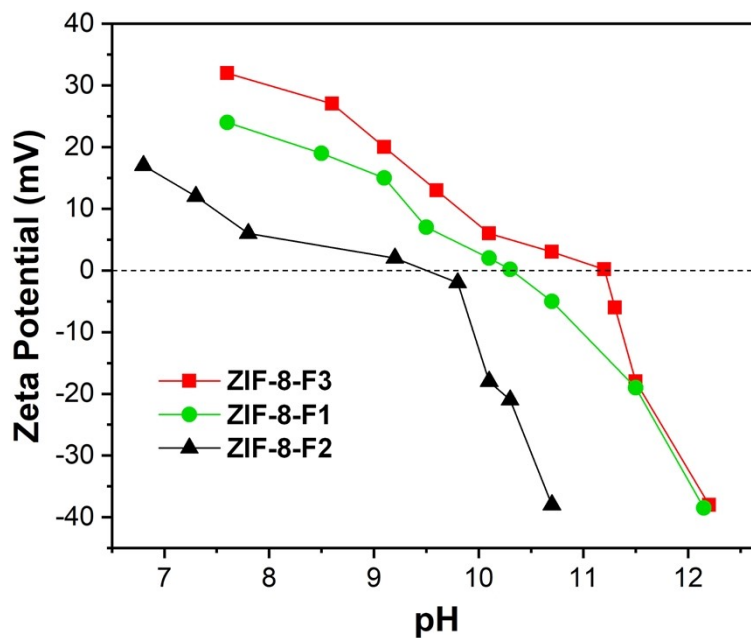

**Figure S2.** Zeta potential measurements for the three ZIF-8 materials: 3D rhombic dodecahedron (ZIF-8-F1), pitaya (ZIF-8-F2), and 2D leaf (ZIF-8-F3) at different pH values.

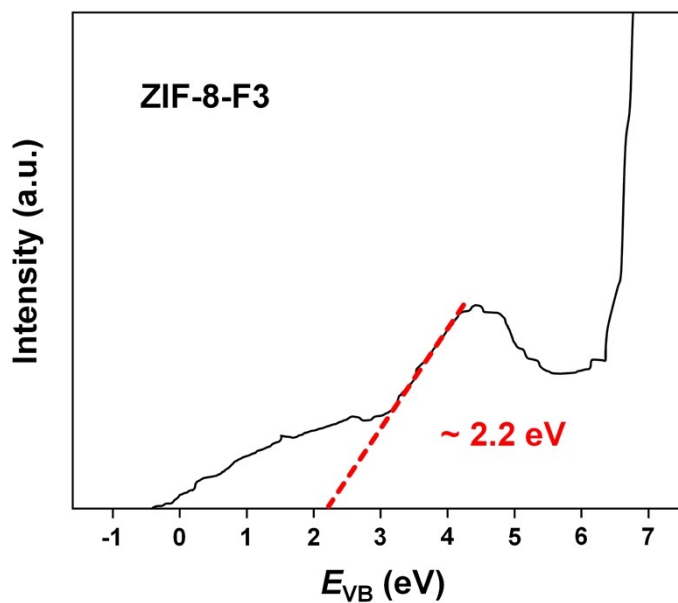

**Figure S3.** XPS valence band (VB) spectrum of 2D leaf-like ZIF-8-F3 materials.

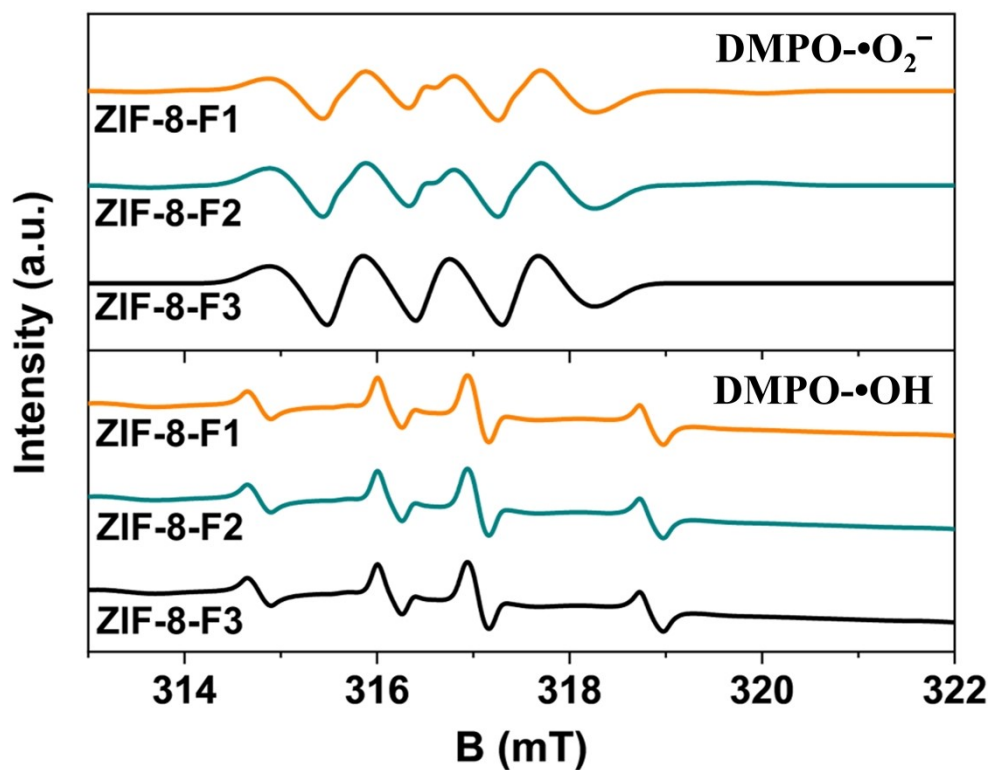

**Figure S4.** Spin-trapping Electron paramagnetic resonance (EPR) spectra of the DMPO-•O<sub>2</sub><sup>-</sup>, and DMPO-•OH radicals of three as-prepared ZIF-8 materials under UV light irradiation.

## REFERENCES

- (1) Pan, Y.; Liu, W.; Zhao, Y.; Wang, C.; Lai, Z. Improved ZIF-8 Membrane: Effect of Activation Procedure and Determination of Diffusivities of Light Hydrocarbons. *J. Memb. Sci.* **2015**, *493*, 88–96. [https://doi.org/https://doi.org/10.1016/j.memsci.2015.06.019](https://doi.org/10.1016/j.memsci.2015.06.019).
- (2) Muñoz-Gil, D.; Figueiredo, F. M. L. High Surface Proton Conduction in Nanostructured ZIF-8. *Nanomaterials*. **2019**. <https://doi.org/10.3390/nano9101369>.
